# Supplementary material
Source: Royal Society of Chemistry journal article supplement (doi:10.1039/d5fo05631d)
Supplement: d5fo05631d1.pdf [file d5fo05631d1.pdf]

### 1 Supplementary Table 1 Absolute changes in different biomarkers after six weeks of intervention

|                                           | Pasture-derived Cheddar cheese n=33 |              |              | TMR-derived Cheddar cheese n=27 |              |              | Cohen's <i>d</i> |      |        |
|-------------------------------------------|-------------------------------------|--------------|--------------|---------------------------------|--------------|--------------|------------------|------|--------|
|                                           | All                                 | Male         | Female       | All                             | Male         | Female       | All              | Male | Female |
| Weight (kg)                               | -0.38±1.51                          | -0.26±1.84   | -0.48±1.22   | 0.11±1.27                       | -0.35±1.41   | 0.43±1.10    | 0.35             | 0.06 | 0.78   |
| BMI (kg m <sup>-2</sup> )                 | -0.24±0.54                          | -0.19±0.57   | -0.29±0.52   | -0.32±2.12                      | -0.13±0.42   | -0.45±2.77   | 0.05             | 0.12 | 0.08   |
| Body fat (%)                              | -0.40±1.39                          | -0.15±1.35   | -0.60±1.42   | -0.52±2.7                       | 0.15±1.30    | -0.98±3.31   | 0.06             | 0.23 | 0.15   |
| Waist circumference (cm)                  | -0.27±3.97                          | -0.38±4.09   | -0.17±3.99   | 1.19±5.12                       | 0.00±3.94    | 2.01±5.77    | 0.32             | 0.10 | 0.45   |
| SBP (mmHg)                                | -2.22±13.77                         | -4.92±12.46  | 0.04±14.74   | 2.30±8.39                       | 3.55±7.28    | 1.44±9.20    | 0.39             | 0.80 | 0.11   |
| DBP (mmHg)                                | -1.85±6.61                          | -2.16±5.83   | -1.60±7.36   | 1.91±5.42                       | 2.33±5.90    | 1.63±5.25    | 0.62             | 0.77 | 0.50   |
| ucOC:cOC                                  | -0.05±0.11                          | -0.08±0.13   | -0.03±0.07   | -0.04±0.06                      | -0.01±0.06   | -0.06±0.06   | 0.16             | 0.63 | 0.38   |
| dp-ucMGP (pmol L <sup>-1</sup> )          | -44.73±48.37                        | -36.38±45.43 | -51.68±50.91 | -22.53±45.52                    | -23.70±53.81 | -21.73±40.75 | 0.47             | 0.26 | 0.65   |
| Total cholesterol (mmol L <sup>-1</sup> ) | -0.03±0.70                          | -0.10±0.71   | 0.03±0.71    | -0.54±1.72                      | 0.69±1.29    | -1.39±1.47   | 0.41             | 0.79 | 1.25   |
| HDL cholesterol (mmol L <sup>-1</sup> )   | -0.03±0.24                          | -0.04±0.24   | -0.02±0.25   | -0.09±0.49                      | 0.26±0.41    | -0.34±0.40   | 0.18             | 0.95 | 0.97   |
| LDL cholesterol (mmol L <sup>-1</sup> )   | 0.00±0.58                           | -0.03±0.56   | 0.03±0.61    | -0.42±1.48                      | 0.57±1.09    | -1.11±1.33   | 0.40             | 0.73 | 1.12   |
| LDL:HDL                                   | 0.04±0.39                           | 0.10±0.50    | -0.01±0.29   | -0.16±0.95                      | -0.01±0.92   | -0.26±0.99   | 0.29             | 0.17 | 0.36   |

|                                                |             |             |             |              |             |              |      |      |      |
|------------------------------------------------|-------------|-------------|-------------|--------------|-------------|--------------|------|------|------|
| VLDL<br>cholesterol<br>(mmol L <sup>-1</sup> ) | 0.00±0.16   | -0.02±0.17  | 0.02±0.14   | -0.02±0.51   | -0.14±0.52  | 0.06±0.52    | 0.06 | 0.31 | 0.10 |
| Triglycerides<br>(mmol L <sup>-1</sup> )       | -0.01±0.37  | -0.06±0.43  | 0.04±0.32   | -0.03±1.25   | -0.27±1.17  | 0.14±1.32    | 0.03 | 0.26 | 0.11 |
| Apolipoprotein<br>B (mg dL <sup>-1</sup> )     | -0.55±12.98 | -1.13±14.22 | -0.06±12.25 | -10.11±36.83 | 11.82±32.65 | -25.19±32.34 | 0.36 | 0.55 | 1.05 |

---

2 The absolute change was calculated by subtracting the visit 1 value from visit 2 value. Data presented as mean ± standard deviation. The Cohen's

3 *d* values are shown as absolute values.
